# Supplementary material for: New Predictors of Early and Late Outcomes after Primary Percutaneous Coronary Intervention in Patients with ST-Segment Elevation Myocardial Infarction and Unprotected Left Main Coronary Artery Culprit Lesion
Source: Hindawi journal article supplement (doi:10.1155/2019/8238972), 2019-03-18
Supplement: f1 [file 8238972.f1.pdf]

Supporting Table 1: Univariate analysis for the prediction of the 30-days and one-year all-cause mortality

BMS = bare-metal stent, DES = drug-eluting stent, LM = Left Main, PCI = percutaneous coronary intervention, TIMI = Thrombolysis in Myocardial Infarction.

|                                           | 30 days |            |         | One year |            |         |
|-------------------------------------------|---------|------------|---------|----------|------------|---------|
|                                           | OR      | 95% CI     | p       | OR       | 95% CI     | p       |
| LM TIMI flow 0/1                          | 4.54    | 1.56-14.08 | 0.006   | 3.67     | 11.76-1.27 | 0.02    |
| Cardiogenic shock before PCI              | 10.8    | 3.73-36.87 | < 0.001 | 5.75     | 2.25-15.70 | < 0.001 |
| Age (years)                               | 1.02    | 0.98-1.062 | 0.198   | 1.04     | 1.005-1.08 | 0.03    |
| Total ischemic time (min)                 | 1       | 0.99-1.002 | 0.684   | 0.73     | 0.27-1.98  | 0.54    |
| Diabetes                                  | 1.74    | 0.66-4.54  | 0.253   | 1        | 0.99-1.002 | 0.733   |
| Cardiac arrest before PCI                 | 6.87    | 2.55-19.83 | < 0.001 | 4.47     | 1.72-12.39 | 0.003   |
| Left ventricular ejection fraction (<40%) | 4.24    | 1.39-15.87 | 0.018   | 2.76     | 1.02-8.06  | 0.051   |
| EuroSCORE II                              | 1.03    | 1.009-1.06 | 0.01    | 1.04     | 1.01-1.07  | 0.005   |
| Number of diseased vessels                | 0.98    | 0.65-1.47  | 0.937   | 1.22     | 0.83-1.83  | 0.312   |
| SYNTAX Score I                            | 1.05    | 1.009-1.10 | 0.023   | 1.07     | 1.01-1.101 | 0.022   |
| SYNTAX Revascularization Index            | 0.97    | 0.95-0.99  | 0.008   | 1.06     | 0.95-0.99  | 0.009   |
| PCI SYNTAX II Score                       | 1.04    | 1.01-1.08  | 0.01    | 0.37     | 1.03-1.11  | < 0.001 |
| Residual SYNTAX Score                     | 1.06    | 1.02-1.12  | 0.01    | 1.05     | 1.02-1.13  | 0.012   |
| DES vs BMS                                | 0.53    | 0.19-1.4   | 0.21    | 0.97     | 0.14-0.96  | 0.046   |
